# Supplementary material
Source: PubMed Central journal article supplement (PMC3684216)
Supplement: supp_12-11471_IOVS-12-11471-s01.pdf [file supp_12-11471_IOVS-12-11471-s01.pdf]

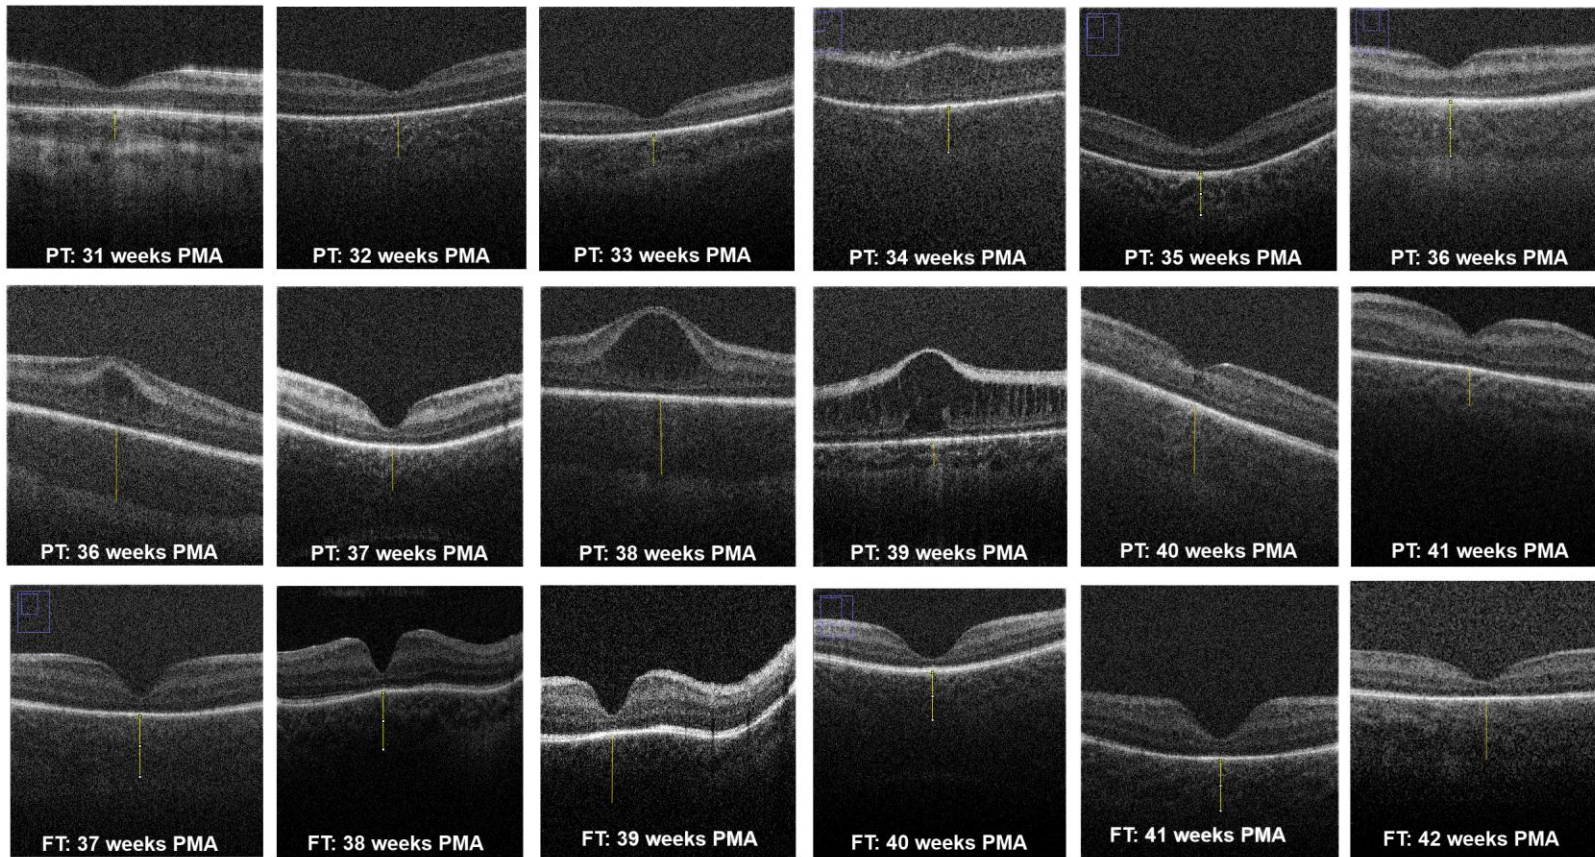

**Supplemental Figure 1.** Representative SDOCT central foveal frames per week of development in preterm (PT) and full term (FT) infants. The images shown are SDOCT central foveal frames extracted from the corresponding macular volumes. There is considerable variability of CSJ visibility and choroid reflectivity.
